# Supplementary material
Source: ML conference proceedings conference paper supplement (https://www.ecva.net/papers/eccv_2020/papers_ECCV/html/123470239_ECCV_2020_paper.php)
Supplement: Supplementary file 2 [file 123470239-supp.zip]

Archive with 3 entries (3 files):
- appendix.pdf
- megadepth_scene_5992.mp4
- megadepth_scene_8457.mp4
